# Supplementary material for: Cerebral-Organoid-Derived Exosomes Alleviate Oxidative Stress and Promote LMX1A-Dependent Dopaminergic Differentiation
Source: MDPI journal article supplement (doi:10.3390/ijms241311048), 2023-07-04
Supplement: s1 [file s1]

Supplementary Materials

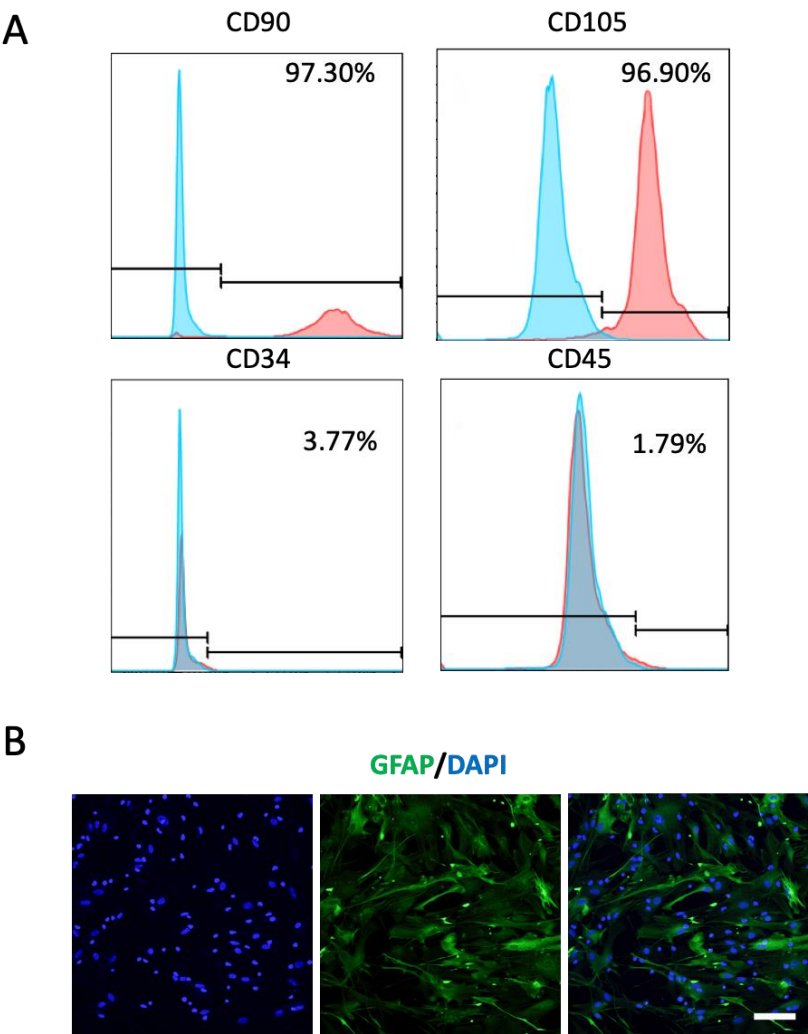

**Figure S1.** Characterization of primary cultured MSCs and rat midbrain AS. (A) MSCs were stained with surface markers CD90, CD105, CD34, and CD45 and subjected to flow cytometry analysis. ~97% of cells are immunoreactive to mesenchymal stem cell markers CD90 and CD105 and negative for hematopoietic markers CD34 and CD45. (B) Immunostaining analysis showed that nearly 95% of cells in the primary astrocytic culture were immunopositive for astrocytic marker GFAP. Scale bars: 100  $\mu$ m.

**Table S1.** The specific primer sequences (5'–3')

| Genes        | Forward primer         | Reverse primer               |
|--------------|------------------------|------------------------------|
| Human        |                        |                              |
| <i>gpadh</i> | GGAGCGAGATCCCTCCAAAAT  | GGCTGTTGTCAT-<br>ACTTCTCATGG |
| <i>nt-4</i>  | CTGTGTGCGATGCAGTCAGT   | TGCAGCGGGTTTCAAAGAAGT        |
| <i>bdnf</i>  | GGCTTGACATCATTGGCTGAC  | CATTGGGCCGAACTTTCTGGT        |
| <i>gdnf</i>  | GGCAGTGCTTCCTAGAAGAGA  | AAGACACAACCCCGGTTTTTG        |
| <i>lmx1a</i> | GCAAAGGGGACTATGAGAAGGA | CGTTTGGGGCGCTTATGGT          |
| <i>wnt1</i>  | CGATGGTGGGGTATTGTGAAC  | CCGGATTTTGGCGTATCAGAC        |
| <i>en1</i>   | TTCCAGGCAAACCGCTACATC  | ACTCGCTCTCGTCTTTGTCCT        |
| <i>corin</i> | CCAAAGCCGGTCTTGAGAG    | GAGGAGGTTAGCAGTCGCC          |
| <i>mash1</i> | CCAAGCAAGTCAAGCGACAG   | TAGCCAAAGCCGCTGAAGTT         |
| <i>ptbp1</i> | CTCACCAGCCTCAACGTCAA   | TTATACCAGGTGCACCGAAGG        |

---

|                 |                          |                        |
|-----------------|--------------------------|------------------------|
| <i>pitx3</i>    | CAGAGGACGGTTCGCTGAAAA    | AGCTGCCTTTGCATAGCTCG   |
| <i>nurr1</i>    | ACCACTCTTCGGGAGAATACA    | GGCATTGTGTACAAGCAAGGT  |
| Rat             |                          |                        |
| <i>β-actin</i>  | ATGGATGACGATATCGCTGCG    | GTAGGAGTCCTTCTGACCCAT  |
| <i>apaf-1</i>   | ACTTGTCGGCCCTGCGCATC     | GGGGCGAACGACTAAGCGGG   |
| <i>bax</i>      | TTGCTACAGGGTTTCATCC      | GTCCAGTTCATCGCCAAT     |
| <i>bcl-2</i>    | GTCATAACTAAAGACACCCC     | TTCATCTCCAGTATCCCCTC   |
| <i>caspase3</i> | CGGAGCTTGGAACGCGA        | ACACAAGCCCATTTCAGGGTA  |
| <i>p53</i>      | GTCGGCTCCGACTATACCACTATC | CTCTCTTTGCACTCCCTGGGGG |

---
